# Supplementary material for: Epidemiology of Coccidioidomycosis in the Veterans Health Administration, 2013–2022
Source: MDPI journal article supplement (doi:10.3390/jof9070731), 2023-07-06
Supplement: s1 [file s1]

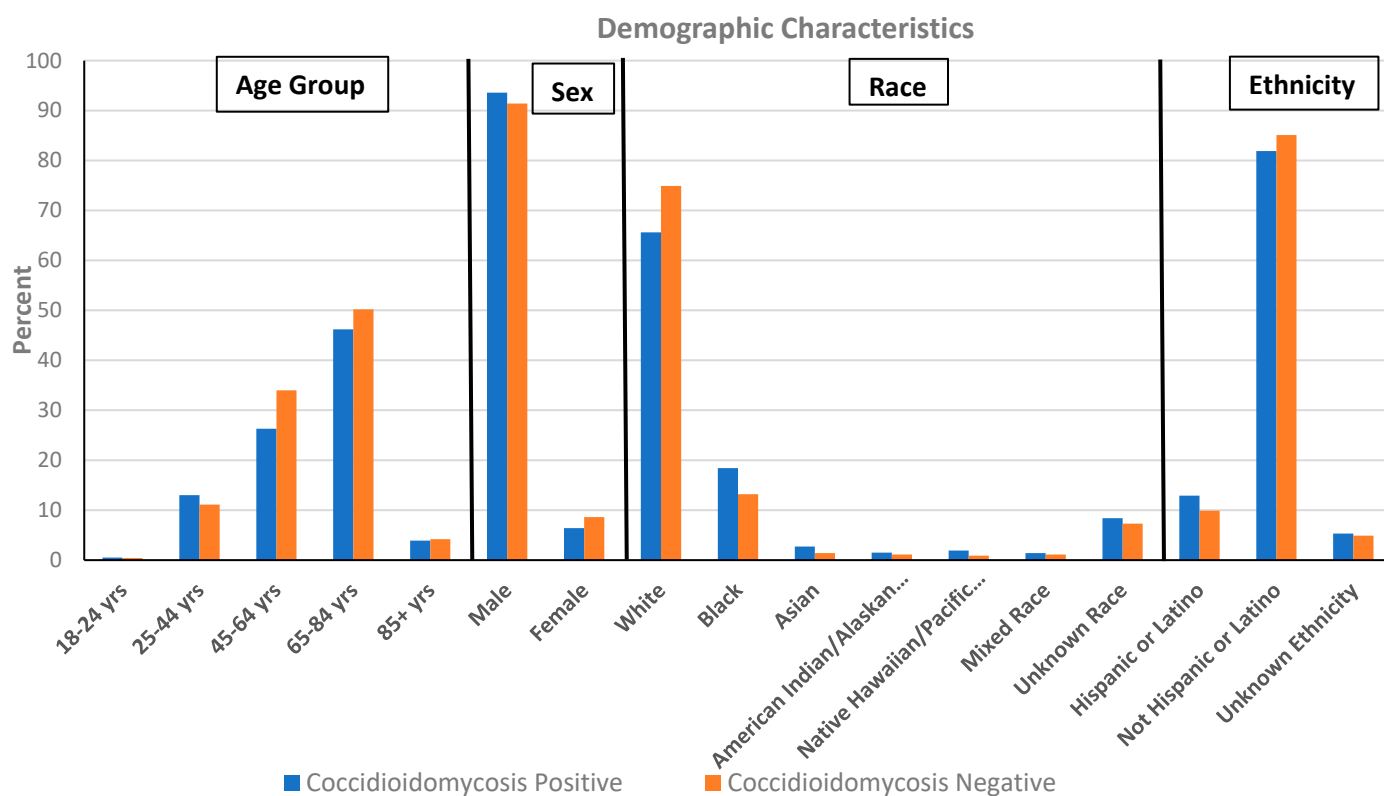

**Figure S1.** Demographic comparisons for coccidioidomycosis-positive (n = 4204) and coccidioidomycosis-negative (n = 63,322) patients, Veterans Health Administration, 2013–2022.
